# Supplementary material for: The Polish version of the Cultural Intelligence Scale: Assessment of its reliability and validity among healthcare professionals and medical faculty students
Source: PubMed Central journal article supplement (PMC6876986; doi:10.1371/journal.pone.0225240), 2019-11-25
Supplement: pone.0225240.s001.pdf [file pone.0225240.s001.pdf]

## Skala Inteligencji Kulturowej

Pseudonim:.....

Płeć:..... Wiek:.....

Wykształcenie:.....

Zawód:.....

Email/dane kontaktowe (opcjonalne): .....

Narodowość .....

**Instrukcja:** Zapoznaj się uważnie z poniższymi stwierdzeniami, a następnie określ, w jakim stopniu zgadzasz się z każdym z nich. Do każdego stwierdzenia należy ustosunkować się korzystając z następującej skali:

|                                 |   |   |   |   |   |                             |
|---------------------------------|---|---|---|---|---|-----------------------------|
| Zdecydowanie<br>nie zgadzam się |   |   |   |   |   | Zdecydowanie<br>zgadzam się |
| 1                               | 2 | 3 | 4 | 5 | 6 | 7                           |

Przeczytaj każde stwierdzenie i wybierz taką odpowiedź, która najlepiej opisuje to, jaka/jaki NAPRAWDĘ JESTEŚ. Nie ma tutaj odpowiedzi dobrych i złych, dlatego odpowiadaj szczerze i zgodnie z własnym przekonaniem.

Zaznacz swoje odpowiedzi poprzez zakreślenie kółkiem cyfry w odpowiedniej kratce.

|    |                                                                                                          | Zdecydowanie<br>nie zgadzam się |   |   |   |   |   | Zdecydowanie<br>zgadzam się |
|----|----------------------------------------------------------------------------------------------------------|---------------------------------|---|---|---|---|---|-----------------------------|
| 1. | Jestem świadoma/y wiedzy kulturowej, której używam podczas komunikowania się z osobami z różnych kultur. | 1                               | 2 | 3 | 4 | 5 | 6 | 7                           |
| 2. | Aktualizuję swoją wiedzę kulturową, kiedy komunikuję się z osobami z nieznanego mi kultury.              | 1                               | 2 | 3 | 4 | 5 | 6 | 7                           |
| 3. | Jestem świadoma/y swojej wiedzy kulturowej, którą stosuję w interakcjach międzykulturowych.              | 1                               | 2 | 3 | 4 | 5 | 6 | 7                           |
| 4. | Sprawdzam dokładność swojej wiedzy kulturowej, kiedy komunikuję się z osobami z różnych kultur.          | 1                               | 2 | 3 | 4 | 5 | 6 | 7                           |
| 5. | Znam prawne i ekonomiczne systemy obowiązujące w innych kulturach.                                       | 1                               | 2 | 3 | 4 | 5 | 6 | 7                           |
| 6. | Znam zasady (np. słownictwo, gramatykę) obowiązujące w innych językach.                                  | 1                               | 2 | 3 | 4 | 5 | 6 | 7                           |
| 7. | Znam wartości kulturowe i przekonania religijne istniejące w innych kulturach.                           | 1                               | 2 | 3 | 4 | 5 | 6 | 7                           |
| 8. | Znam zwyczaje dotyczące zawierania małżeństw, które istnieją w innych kulturach.                         | 1                               | 2 | 3 | 4 | 5 | 6 | 7                           |
| 9. | Znam sztukę i rzemiosło innych kultur.                                                                   | 1                               | 2 | 3 | 4 | 5 | 6 | 7                           |

|     |                                                                                                                                   | Zdecydowanie<br>nie zgadzam się |   |   |   |   |   | Zdecydowanie<br>zgadzam się |
|-----|-----------------------------------------------------------------------------------------------------------------------------------|---------------------------------|---|---|---|---|---|-----------------------------|
| 10. | Znam zasady wyrażania zachowań niewerbalnych, które obowiązują w innych kulturach.                                                | 1                               | 2 | 3 | 4 | 5 | 6 | 7                           |
| 11. | Lubię nawiązywać kontakty z osobami z różnych kultur.                                                                             | 1                               | 2 | 3 | 4 | 5 | 6 | 7                           |
| 12. | Jestem przekonana/y, że potrafię nawiązać towarzyskie kontakty z lokalnymi mieszkańcami, którzy pochodzą z nieznanego mi kultury. | 1                               | 2 | 3 | 4 | 5 | 6 | 7                           |
| 13. | Jestem przekonana/y, że potrafię poradzić sobie ze stresem związanym z dostosowaniem się do kultury, która jest dla mnie nowa.    | 1                               | 2 | 3 | 4 | 5 | 6 | 7                           |
| 14. | Lubię żyć w kulturach, które są dla mnie obce.                                                                                    | 1                               | 2 | 3 | 4 | 5 | 6 | 7                           |
| 15. | Jestem przekonana/y, że mogę przyzwycząić się do zasad robienia zakupów, jakie obowiązują w innej kulturze.                       | 1                               | 2 | 3 | 4 | 5 | 6 | 7                           |
| 16. | Zmieniam swoje zachowanie werbalne (np. akcent, ton głosu), gdy wymaga tego interakcja międzykulturowa.                           | 1                               | 2 | 3 | 4 | 5 | 6 | 7                           |
| 17. | Inaczej stosuję przerwy w mówieniu i ciszę po to, by dostosować się do różnych sytuacji międzykulturowych.                        | 1                               | 2 | 3 | 4 | 5 | 6 | 7                           |
| 18. | Zmieniam tempo mówienia, gdy wymaga tego międzykulturowa sytuacja.                                                                | 1                               | 2 | 3 | 4 | 5 | 6 | 7                           |
| 19. | Zmieniam swoje zachowanie niewerbalne, gdy wymaga tego sytuacja międzykulturowa.                                                  | 1                               | 2 | 3 | 4 | 5 | 6 | 7                           |
| 20. | Zmieniam swoją mimikę twarzy, gdy wymaga tego interakcja międzykulturowa.                                                         | 1                               | 2 | 3 | 4 | 5 | 6 | 7                           |
